# Supplementary material for: A Magnetic Bead-Based Sensor for the Quantification of Multiple Prostate Cancer Biomarkers
Source: PubMed Central journal article supplement (PMC4589536; doi:10.1371/journal.pone.0139484), 2015-09-30
Supplement: pone.0139484.s001.pdf [file pone.0139484.s001.pdf]

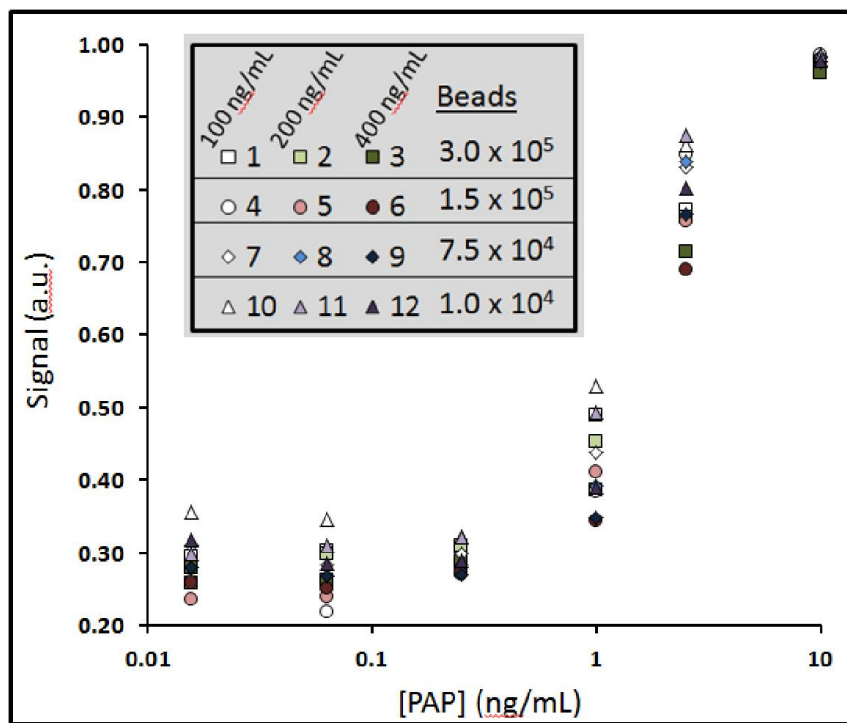

S1 Fig.
