# Supplementary material for: A Magnetic Bead-Based Sensor for the Quantification of Multiple Prostate Cancer Biomarkers
Source: PubMed Central journal article supplement (PMC4589536; doi:10.1371/journal.pone.0139484), 2015-09-30
Supplement: pone.0139484.s002.pdf [file pone.0139484.s002.pdf]

**S1 Table.**

| <b>Biomarker</b> | <b>G6<br/>(ng/mL)</b> | <b>G7<br/>(ng/mL)</b> | <b>P value</b> |
|------------------|-----------------------|-----------------------|----------------|
| tPSA             | 12.9 ± 8.4            | 11.9 ± 13.1           | <0.01          |
| fPSA             | 0.79 ± 0.75           | 2.21 ± 0.67           | 0.58           |
| PAP              | 2.0 ± 1.0             | 2.6 ± 1.2             | 0.11           |
| SPARC            | 840 ± 334             | 1731 ± 294            | 0.96           |
| CA1              | 1738 ± 2236           | 585 ± 1664            | 0.07           |
| IL-6sR           | 75.3 ± 13.9           | 75.2 ± 22.3           | 0.09           |
| SPON2            | 83 ± 52               | 243 ± 43              | 0.16           |
